# Supplementary material for: Mechanism of upconversion luminescence enhancement in Yb3+/Er3+ co-doped Y2O3 through Li+ incorporation
Source: Royal Society of Chemistry journal article supplement (doi:10.1039/c9cp06137a), 2020-01-01
Supplement: c9cp06137a1.pdf [file c9cp06137a1.pdf]

# Mechanism of upconversion luminescence enhancement in $\text{Yb}^{3+}/\text{Er}^{3+}$ co-doped $\text{Y}_2\text{O}_3$ through $\text{Li}^+$ incorporation

Xiongfeng Yang<sup>a</sup>, Min Liu<sup>b</sup>, Jiandang Liu<sup>c</sup>, Yuanhua Xia<sup>d</sup>, Weiwei Ji<sup>a</sup>, Zhiang Li<sup>a</sup>, Jifang  
Chen<sup>a</sup>, Liu Liu<sup>a</sup>, Luyuan Hao<sup>a</sup>, Bingbing Dong,<sup>a</sup> Simeon Agathopoulos<sup>e</sup>, Xin Xu<sup>a,\*</sup>

<sup>a</sup>CAS Key Laboratory of Materials for Energy Conversion, Department of Materials Science and Engineering, University of Science and Technology of China, Hefei, Anhui 230026, PR China.

<sup>b</sup>School of Materials Science & Engineering, Shanghai institute of technology, 100 Haiquan Road, Shanghai, 201418, PR China,

<sup>c</sup>State Key Laboratory of Particle Detection and Electronic, University of Science and Technology of China, Hefei, Anhui 230026, PR China.

<sup>d</sup>Institute of Nuclear Physics and Chemistry, China Academy of Engineering Physics, Mianyang 621999, China.

<sup>e</sup>Department of Materials Science and Engineering, University of Ioannina, GR-451 10 Ioannina, Greece.

\*Correspondence: xuxin@ustc.edu.cn (Prof. Xin Xu)

Table S1. Rietveld fitting parameters for the Li6

| Atom | Site | x      | y      | z      | Occupancy | U <sub>iso</sub> |
|------|------|--------|--------|--------|-----------|------------------|
| Y    | 8a   | 0.25   | 0.25   | 0.25   | 0.9611    | 0.03             |
| Y    | 24d  | 0.9716 | 0      | 0.25   | 0.9763    | 0.00005          |
| Li   | 8a   | 0.25   | 0.25   | 0.25   | 0.0389    | 0.03             |
| Li   | 24d  | 0.9716 | 0      | 0.25   | 0.0237    | 0.00005          |
| O    | 48e  | 0.3904 | 0.1530 | 0.3811 | 0.99      | 0.0001           |

Table S2. Rietveld fitting parameters for the Li12

| Atom | Site | x      | y      | z      | Occupancy | U <sub>iso</sub> |
|------|------|--------|--------|--------|-----------|------------------|
| Y    | 8a   | 0.25   | 0.25   | 0.25   | 0.9287    | 0.01204          |
| Y    | 24d  | 0.9688 | 0      | 0.25   | 0.9124    | 0.0089           |
| Li   | 8a   | 0.25   | 0.25   | 0.25   | 0.0613    | 0.01204          |
| Li   | 24d  | 0.9688 | 0      | 0.25   | 0.0876    | 0.0089           |
| O    | 48e  | 0.3908 | 0.1514 | 0.3802 | 0.9410    | 0.0097           |

The measured diffraction patterns of X-ray diffraction and neutron diffraction were refined by Rietveld analysis using the GSAS software.<sup>1</sup>

Table S3. Ratio of various oxygen species, estimated from the relative area of the fitted subpeaks.

| Sample | O <sup>2-</sup> (%) | O <sub>2</sub> <sup>2-</sup> /O <sup>-</sup> | -OH/O <sub>2</sub> (%) | CO <sub>3</sub> <sup>2-</sup> /CO <sub>2</sub> (%) |
|--------|---------------------|----------------------------------------------|------------------------|----------------------------------------------------|
| Li0    | 34.4                | 8.4                                          | 41.0                   | 16.2                                               |
| Li6    | 25.4                | 9.3                                          | 44.7                   | 20.6                                               |
| Li12   | 8.1                 | 11.2                                         | 57.8                   | 22.9                                               |

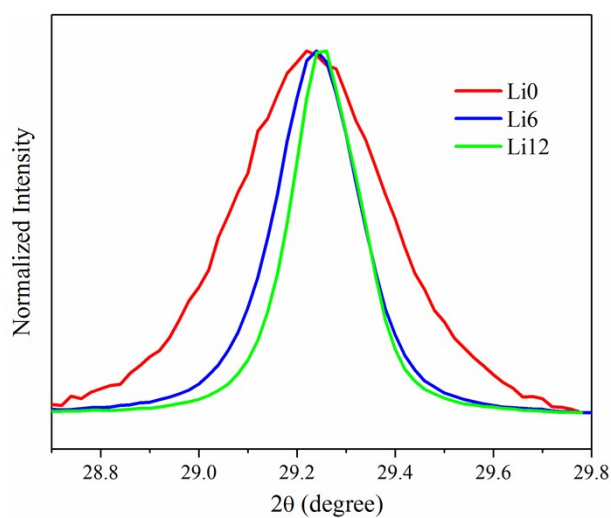

Figure S1. Dependence of the FWHM\* of a given X-ray diffraction peak on Li<sup>+</sup> content.

\*:The average crystallite size of the powders ( $D$ ) was calculated by using the Scherrer's equation

$$D = \frac{K\lambda}{\beta \cos \theta}$$

where  $K$  is the Scherrer's shape factor constant (0.94),  $\lambda$  is the wavelength of the X-ray ( $\lambda = 1.5406 \text{ \AA}$ ), and  $\beta$  is the full-width at half maximum (FWHM), in radians, of the diffraction peak at a certain value of  $2\theta$ .

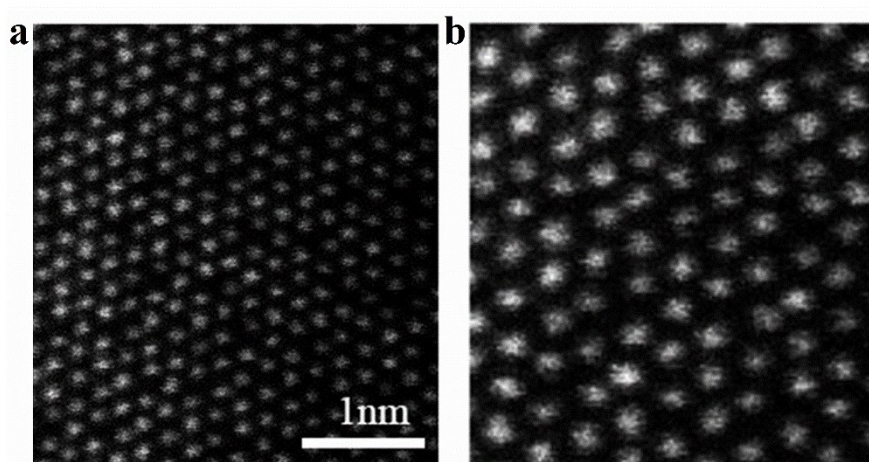

Figure S2. HAADF-STEM image from the Li12 sample (a), and (b) local enlarged view of the image in (a).

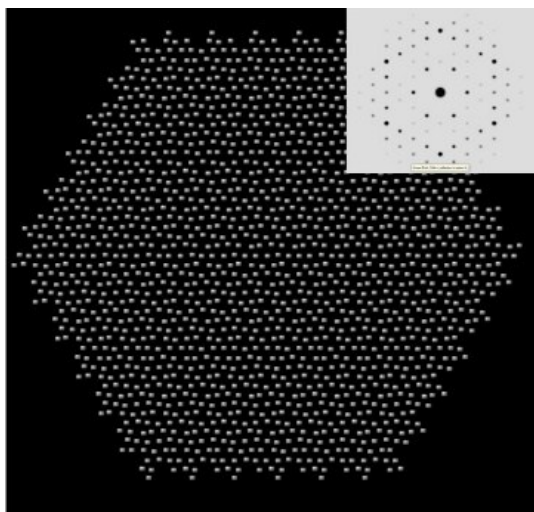

Figure S3. Arrangement of Y atoms along the  $[111]$  axis projection in the  $\text{Y}_2\text{O}_3$  supercell. The inset shows the SAED pattern in the  $[111]$  zone axis in  $\text{Y}_2\text{O}_3$  (by crystalmaker).

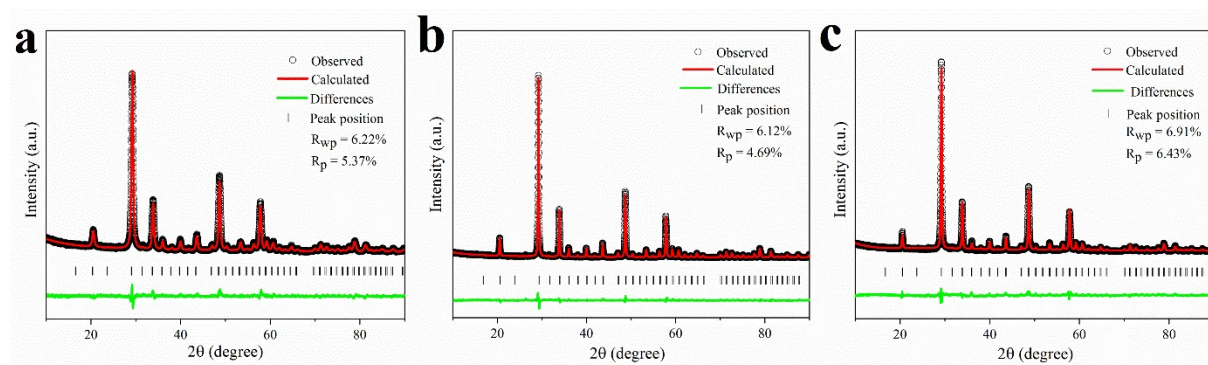

Figure S4. X-ray diffraction patterns and refinement for the samples  $(Y_{1-X}Li_X)_2O_3$  with  $X =$  (a) 0.00, (b) 0.06, and (c) 0.12.



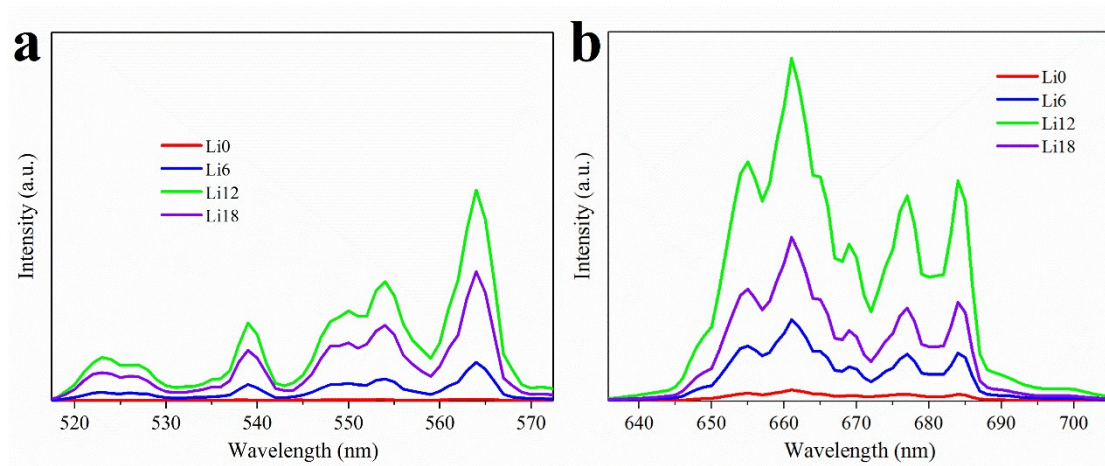

Figure S5. Magnification of room temperature upconversion spectra in (a) the green light, (b) the red light.

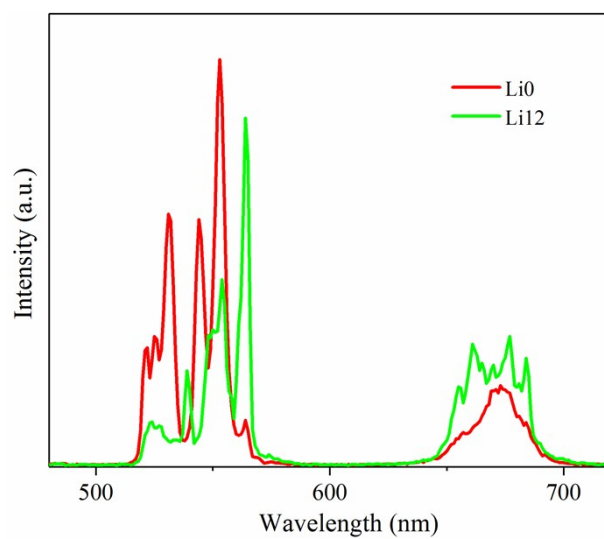

Figure S6. Room temperature upconversion spectra of  $(Y_{0.98-X}Er_{0.02}Li_X)_2O_3$  powders ( $X = 0.00$  and  $0.12$ ) under the excitation of a 980 nm CW laser with the same pump power.

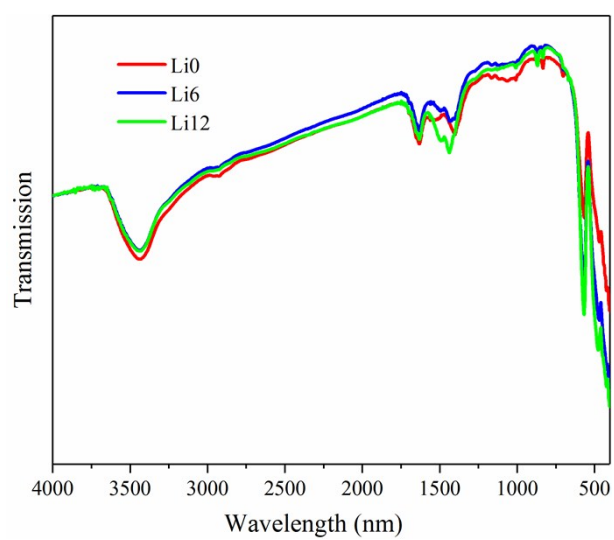

Figure S7. FT-IR spectra of the samples.

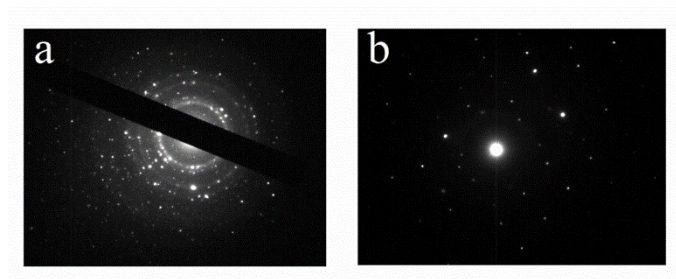

Figure S8. SAED patterns of the samples (a) Li0 and (b) Li12.

#### Reference

- 1 L. B. McCusker, R. B. Von Dreele, D. E. Cox, D. Louër and P. Scardi, Rietveld refinement guidelines, *Journal of Applied Crystallography*, 1999, **32**, 36–50.
